# Supplementary material
Source: PubMed Central journal article supplement (PMC6174356)
Supplement: mmc1.pdf [file mmc1.pdf]

**The American Journal of Human Genetics, Volume 103**

**Supplemental Data**

**Phenotype-Specific Enrichment of Mendelian Disorder**

**Genes near GWAS Regions across 62 Complex Traits**

**Malika Kumar Freund, Kathryn S. Burch, Huwenbo Shi, Nicholas Mancuso, Gleb Kichaev, Kristina M. Garske, David Z. Pan, Zong Miao, Karen L. Mohlke, Markku Laakso, Päivi Pajukanta, Bogdan Pasaniuc, and Valerie A. Arboleda**

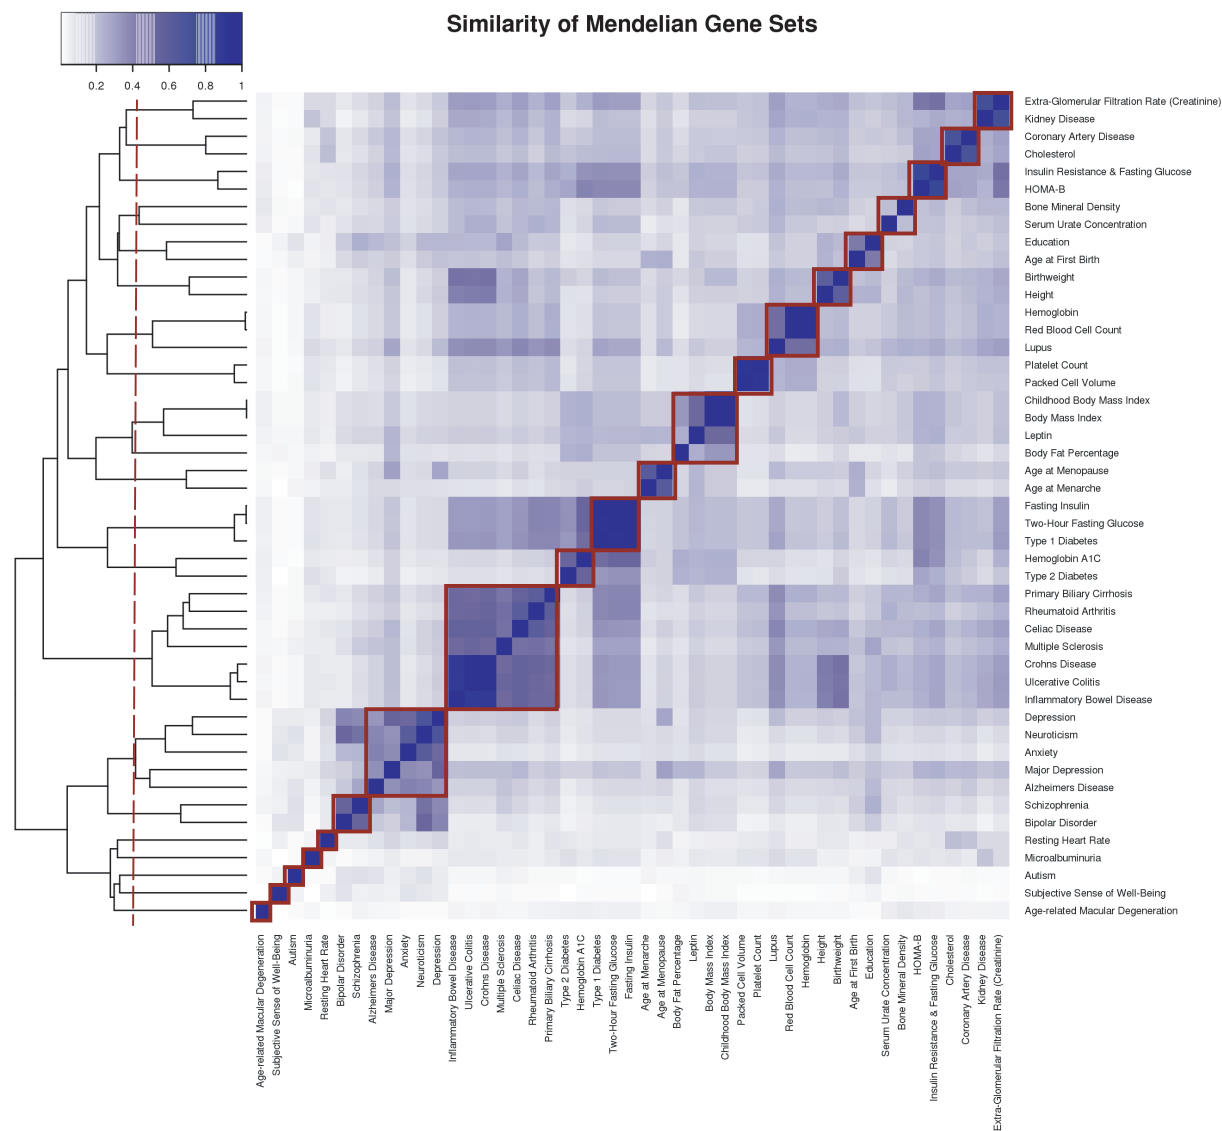

**Figure S1: Similarity of Mendelian disorder gene sets**

After generation of phenotype-specific Mendelian disorder gene sets, we performed pairwise comparisons of each gene set to determine proportions of genes shared. We performed hierarchical clustering, and gene sets sharing large proportions of genes (identified by visual clusters based on a hierarchical clustering threshold, indicated in red boxes and red dashed line respectively) were intersected to form a single representative Mendelian disorder gene set (see Table S3 for these cluster descriptions).

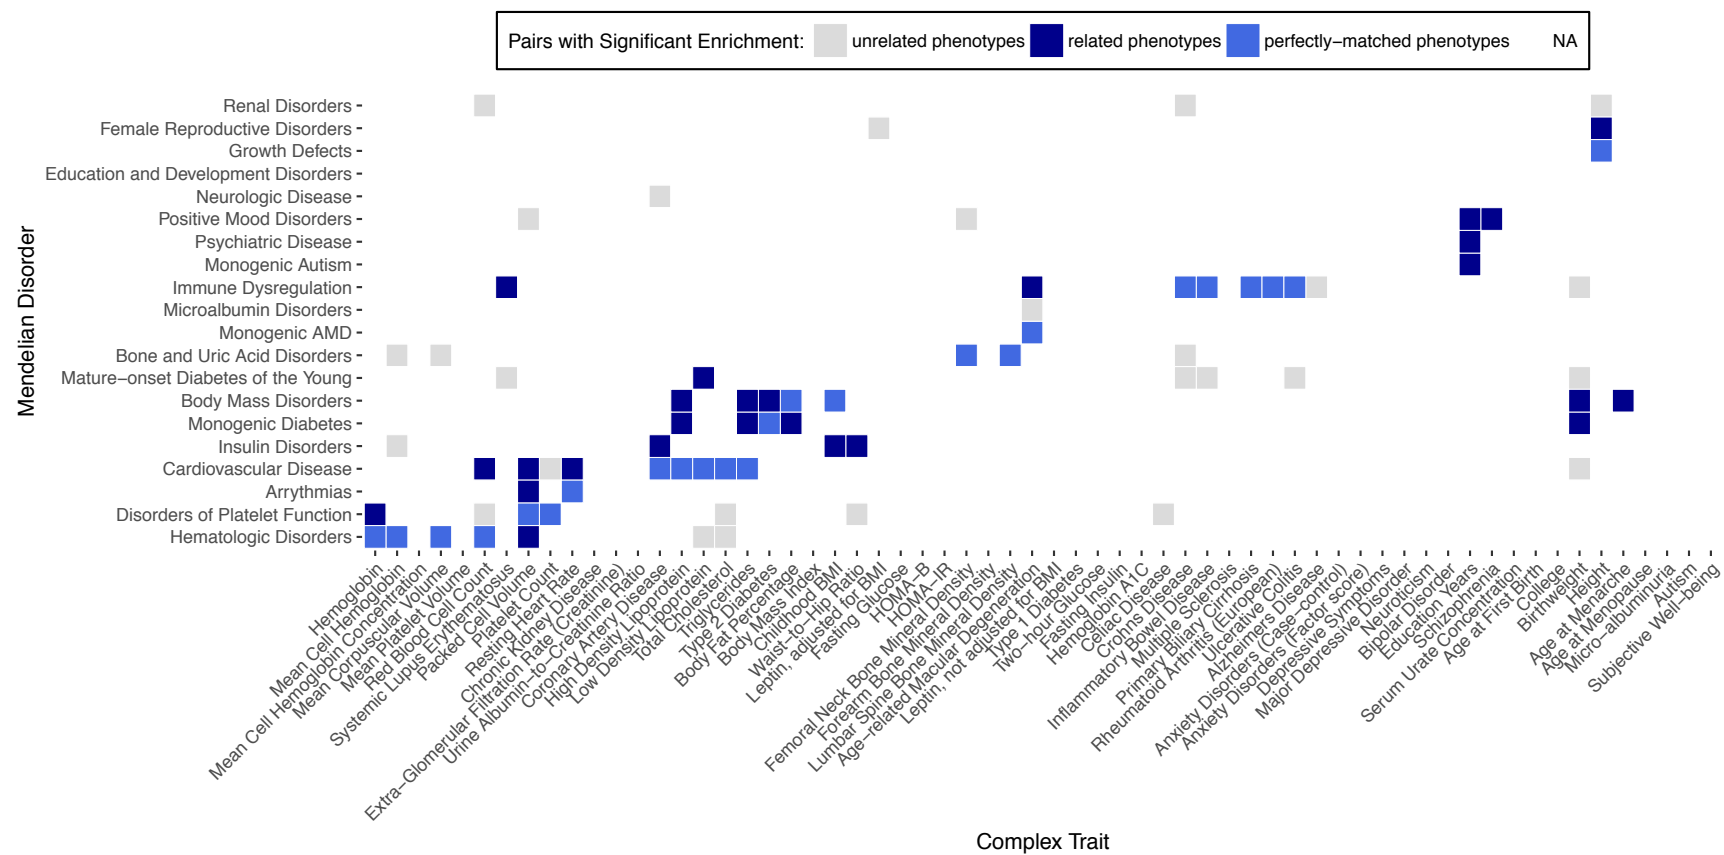

**Figure S2: Overlap of GWAS genes with Mendelian disorder genes demonstrates trait-specificity**

After generation of phenotype-specific Mendelian disorder gene sets, we performed pairwise comparisons of each gene set to determine proportions of genes shared. We performed hierarchical clustering, and gene sets sharing large proportions of genes (identified by visual clusters based on a hierarchical clustering threshold, indicated in red boxes and red dashed line respectively) were intersected to form a single representative Mendelian disorder gene set (see Table S3 for these cluster descriptions).

| Complex Trait                                    | Abbrev. | Mean GWAS Sample Size | Number of Significant GWAS Loci Reported | Number of Significant GWAS SNPs | Number of GWAS Genes | Matched Mendelian Disorder(s) |
|--------------------------------------------------|---------|-----------------------|------------------------------------------|---------------------------------|----------------------|-------------------------------|
| Celiac Disease <sup>60</sup>                     | CEL     | 15283                 | 13                                       | 54                              | 34                   | Immune Dysregulation          |
| Crohn's Disease <sup>61</sup>                    | CD      | 27726                 | 231 total                                | 4381                            | 239                  |                               |
| Inflammatory Bowel Disease <sup>61</sup>         | IBD     | 34694                 |                                          | 7738                            | 368                  |                               |
| Ulcerative Colitis <sup>67</sup>                 | UC      | 28738                 |                                          | 4239                            | 202                  |                               |
| Primary Biliary Cirrhosis <sup>62</sup>          | PBC     | 13239                 | 28                                       | 704                             | 149                  |                               |
| Rheumatoid Arthritis (European) <sup>63</sup>    | RA      | 58284                 | 101                                      | 16502                           | 297                  |                               |
| Multiple Sclerosis <sup>64</sup>                 | MS      | 27148                 | 52                                       | 487                             | 160                  |                               |
| Autism <sup>65</sup>                             | AUT     | 10610                 | 2                                        | 2                               | 2                    | Monogenic Autism              |
| Hemoglobin <sup>66</sup>                         | HB      | 51255.8               | 11                                       | 325                             | 89                   | Hematologic Disorders         |
| Mean Cell Hemoglobin <sup>66</sup>               | MCH     | 43553.6               | 19                                       | 1188                            | 164                  |                               |
| Mean Cell Hemoglobin Concentration <sup>66</sup> | MCHC    | 46953.9               | 8                                        | 8                               | 12                   |                               |
| Mean Corpuscular Volume <sup>66</sup>            | MCV     | 48472.8               | 23                                       | 1237                            | 180                  |                               |
| Mean Platelet Volume <sup>67</sup>               | MPV     | 16843                 | 25                                       | 705                             | 102                  |                               |
| Red Blood Cell Count <sup>66</sup>               | RBC     | 45304.4               | 10                                       | 908                             | 107                  |                               |
| Systemic Lupus Erythematosus <sup>68</sup>       | SLE     | 23210                 | 43                                       | 4983                            | 286                  |                               |
| Birthweight <sup>69</sup>                        | BW      | 110054.6              | 60                                       | 1978                            | 179                  | Growth Defects                |
| Height <sup>70</sup>                             | HGT     | 239338.3              | 423                                      | 22807                           | 2361                 |                               |
| Femoral Neck Bone Mineral Density <sup>71</sup>  | FN      | 53236                 | 14                                       | 788                             | 58                   | Bone and Uric Acid Disorders  |
| Forearm Bone Mineral Density <sup>71</sup>       | FA      | 53236                 | 3                                        | 136                             | 8                    |                               |
| Lumbar Spine Bone Mineral Density <sup>71</sup>  | LS      | 53236                 | 19                                       | 998                             | 67                   |                               |
| Serum Urate Concentration <sup>72</sup>          | URT     | 107026                | 28                                       | 1991                            | 161                  |                               |

|                                                |      |         |           |      |     |                                    |
|------------------------------------------------|------|---------|-----------|------|-----|------------------------------------|
| Packed Cell Volume <sup>66</sup>               | PCV  | 44925.9 | 4         | 141  | 53  | Disorders of Platelet Function     |
| Platelet Count <sup>67</sup>                   | PLT  | 66867   | 43        | 801  | 134 |                                    |
| Coronary Artery Disease <sup>73</sup>          | CAD  | 184305  | 46        | 1709 | 132 | Cardiovascular Disease             |
| High Density Lipoprotein <sup>74</sup>         | HDL  | 95422   | 157 total | 3131 | 464 |                                    |
| Low Density Lipoprotein <sup>74</sup>          | LDL  | 90686.4 |           | 2796 | 370 |                                    |
| Total Cholesterol <sup>74</sup>                | TC   | 95651.5 |           | 3803 | 500 |                                    |
| Triglycerides <sup>74</sup>                    | TG   | 91882.3 |           | 2965 | 354 |                                    |
| Hemoglobin A1C <sup>75</sup>                   | HBA  | 46368   | 10        | 174  | 33  | Monogenic Diabetes                 |
| Type 2 Diabetes <sup>76</sup>                  | T2D  | 61857.4 | 10        | 191  | 28  | Monogenic AMD                      |
| Age-related Macular Degeneration <sup>77</sup> | AMD  | 33975.1 | 34        | 4087 | 215 |                                    |
| Age at Menarche <sup>78</sup>                  | MNR  | 182416  | 106       | 2011 | 207 | Female Reproductive Disorders      |
| Age at Menopause <sup>79</sup>                 | MNP  | 70000   | 44        | 1656 | 316 |                                    |
| Fasting Glucose <sup>80</sup>                  | FG   | 46186   | 16 total  | 231  | 39  | Insulin Disorders                  |
| HOMA-B <sup>80</sup>                           | HMB  | 46186   |           | 95   | 12  |                                    |
| HOMA-IR <sup>80</sup>                          | HMIR | 46186   |           | 1    | 1   |                                    |
| Micro-albuminuria <sup>81</sup>                | MA   | 52988.4 | 1         | 4    | 2   | Microalbumin Disorders             |
| Fasting Insulin <sup>80</sup>                  | FI   | 108557  | 1         | 43   | 23  | Mature-onset Diabetes of the Young |
| Two-hour Glucose <sup>82</sup>                 | 2HG  | 15234   | 3         | 4    | 2   |                                    |
| Type 1 Diabetes <sup>83</sup>                  | T1D  | 24341   | 42        | 1447 | 144 |                                    |
| Alzheimer's Disease <sup>84</sup>              | ALZ  | 54162   | 19        | 813  | 58  | Neurologic Disease                 |
| Anxiety Disorders (Case-control) <sup>85</sup> | ANXC | 14643.1 | 1         | 8    | 2   |                                    |
| Anxiety Disorders (Factor score) <sup>85</sup> | ANXF | 16218.2 | 1         | 43   | 3   |                                    |
| Major Depressive Disorder <sup>86</sup>        | MDD  | 10610   | 1         | 5    | 4   |                                    |
| Depressive Symptoms <sup>87</sup>              | DS   | 161460  | 2         | 28   | 10  |                                    |
| Neuroticism <sup>87</sup>                      | NRT  | 170911  | 11        | 1933 | 82  |                                    |
| Bipolar Disorder <sup>88</sup>                 | BIP  | 16731   | 4         | 39   | 8   | Psychiatric Disease                |

|                                                 |      |          |         |      |     |                                     |
|-------------------------------------------------|------|----------|---------|------|-----|-------------------------------------|
| Schizophrenia <sup>89</sup>                     | SCZ  | 150064   | 108     | 6808 | 479 |                                     |
| Chronic Kidney Disease <sup>90</sup>            | CKD  | 117340   | 4       | 107  | 16  | Renal Disorders                     |
| Glomerular Filtration Rate (CRN) <sup>90</sup>  | EGFR | 132725.4 | 43      | 1401 | 162 |                                     |
| Urine Albumin-to-Creatinine Ratio <sup>81</sup> | UACR | 53343.1  | 1       | 4    | 2   |                                     |
| Resting Heart Rate <sup>91</sup>                | RHR  | 265046   | 64      | 4568 | 304 | Arrhythmias                         |
| Age at First Birth <sup>92</sup>                | AFB  | 251151   | 12      | 238  | 45  | Education and Development Disorders |
| College <sup>93</sup>                           | COL  | 126559   | 3       | 71   | 12  |                                     |
| Education Years <sup>94</sup>                   | EY   | 293723   | 74      | 6537 | 554 |                                     |
| Subjective Well-being <sup>87</sup>             | SWB  | 298420   | 3       | 37   | 9   | Positive Mood Disorders             |
| Body Fat Percentage <sup>95</sup>               | BFP  | 57721.7  | 12      | 196  | 22  | Body Mass Disorders                 |
| Body Mass Index <sup>96</sup>                   | BMI  | 224996   | 97      | 1585 | 231 |                                     |
| Childhood BMI <sup>97</sup>                     | CBMI | 28964.1  | 15      | 438  | 49  |                                     |
| Leptin, adjusted for BMI <sup>98</sup>          | LEPB | 30202    | 5 total | 8    | 5   |                                     |
| Leptin, not adjusted for BMI <sup>98</sup>      | LEP  | 30507.6  |         | 1    | 0   |                                     |
| Waist-to-Hip Ratio <sup>99</sup>                | WHR  | 139559.2 | 49      | 424  | 74  |                                     |

**Table S1: Complex Traits and corresponding Mendelian disorders.** This table details the phenotypically-matched pairs of complex traits (N=62) and groups of Mendelian disorders (N=20) examined in our study. Mean GWAS Sample Size and Number of Significant GWAS Loci are reported from original GWAS publications for each complex trait. Significant GWAS SNPs are all SNPs from the publicly available summary statistics meeting genome-wide significance at a threshold of  $p < 5 \times 10^{-8}$ . GWAS genes for each complex trait were identified using the mapping approach described in Methods. References in this table match original article references in Table 1.

| Method                                  | Avg. Num. Genes per GWAS Gene Set | Num. Comparisons with Sig. Overlap (% of 1240 Total) | Correlation of Odds Ratios with Closest 2 Genes ( $r^2$ ) |
|-----------------------------------------|-----------------------------------|------------------------------------------------------|-----------------------------------------------------------|
| Closest 2 Genes to each significant SNP | 167                               | 77 (6.21%)                                           | 1.000                                                     |
| 50kb Window                             | 168                               | 48 (3.87%)                                           | 0.792                                                     |
| Closest 2 Genes to credible set SNPs    | 154                               | 34 (2.74%)                                           | 0.658                                                     |
| 500kb Window                            | 533                               | 7 (0.56%)                                            | 0.582                                                     |

**Table S4: Different methods of choosing GWAS genes show similar overlap results**

We mapped GWAS SNPs to genes using two additional window approaches and one credible set SNP-mapping approach, and performed overlap comparisons between a subset of complex gene sets and Mendelian order gene sets (see Methods). The correlation of results with results from our chosen approach is shown in the last column.

| Gene Class                          | Avg. LD Tagged (CI)  | Avg. MAF (CI)        | Avg. Gene Length in bp (CI) |
|-------------------------------------|----------------------|----------------------|-----------------------------|
| All Protein-Coding Genes            | 24.38 (24.35, 24.42) | 0.238 (0.238, 0.238) | 159937 (158161, 161714)     |
| All Mendelian Disorder Genes        | 24.01 (23.93, 24.08) | 0.239 (0.238, 0.239) | 174461 (169804, 179117)     |
| LOF-Intolerant Genes                | 24.19 (24.11, 24.26) | 0.237 (0.237, 0.238) | 214861 (208823, 220898)     |
| Immune Dysregulation                | 24.49 (24.26, 24.71) | 0.236 (0.235, 0.238) | 162527 (154081, 170973)     |
| Monogenic Autism                    | 25.80 (25.47, 26.12) | 0.244 (0.242, 0.247) | 225164 (175162, 275165)     |
| Hematologic Disorders               | 24.34 (24.15, 24.53) | 0.239 (0.238, 0.240) | 162128 (152296, 171959)     |
| Growth Defects                      | 25.54 (25.36, 25.71) | 0.236 (0.235, 0.237) | 169612 (161098, 178127)     |
| Bone and Uric Acid Disorders        | 24.10 (23.79, 24.41) | 0.242 (0.240, 0.244) | 148424 (139958, 156891)     |
| Disorders of Platelet Function      | 24.92 (24.69, 25.16) | 0.240 (0.239, 0.241) | 174260 (160545, 187975)     |
| Cardiovascular Disease              | 24.79 (24.59, 24.98) | 0.237 (0.236, 0.238) | 168739 (158253, 179226)     |
| Monogenic Diabetes                  | 25.73 (25.29, 26.18) | 0.231 (0.229, 0.233) | 167935 (153263, 182606)     |
| Monogenic AMD                       | 19.75 (19.38, 20.13) | 0.241 (0.238, 0.243) | 168410 (149498, 187322)     |
| Female Reproductive Disorders       | 24.44 (24.17, 24.71) | 0.242 (0.241, 0.244) | 163127 (152268, 173987)     |
| Insulin Disorders                   | 23.78 (23.58, 23.97) | 0.238 (0.237, 0.239) | 162444 (154415, 170474)     |
| Microalbumin Disorders              | 23.38 (23.08, 23.69) | 0.239 (0.236, 0.241) | 171182 (148727, 193637)     |
| Mature-onset Diabetes of the Young  | 25.32 (25.08, 25.56) | 0.235 (0.234, 0.237) | 161166 (152361, 169971)     |
| Neurologic Disease                  | 24.32 (24.05, 24.59) | 0.239 (0.237, 0.241) | 189466 (169021, 209911)     |
| Psychiatric Disease                 | 24.01 (23.78, 24.24) | 0.239 (0.237, 0.241) | 213791 (187313, 240270)     |
| Renal Disorders                     | 24.12 (23.97, 24.26) | 0.239 (0.238, 0.240) | 175981 (166510, 185453)     |
| Arrhythmias                         | 22.40 (22.17, 22.63) | 0.237 (0.236, 0.239) | 179407 (160838, 197976)     |
| Education and Development Disorders | 25.16 (24.98, 25.34) | 0.239 (0.238, 0.240) | 207061 (191501, 222622)     |
| Positive Mood Disorders             | 23.40 (22.95, 23.85) | 0.234 (0.231, 0.238) | 217893 (184211, 251575)     |
| Body Mass Disorders                 | 22.17 (21.80, 22.54) | 0.238 (0.235, 0.241) | 168600 (150261, 186940)     |

**Table S6: Gene classes show no substantial difference in average LD tagged, average MAF, or average gene length**

For each gene class as in Supplementary Table ST5, including all phenotype-specific Mendelian disorder gene sets, we identified the average linkage disequilibrium (LD) tagged, average MAF, and average gene length (see Methods).



| Complex Trait | Matched Mendelian Disorder          | Number of Shared Genes | Average Distance to Closest Gene (kb) (CI) |
|---------------|-------------------------------------|------------------------|--------------------------------------------|
| AFB           | Education and Development Disorders | 6                      | 238.8 (238.8, 238.8)                       |
| AMD           | Monogenic AMD                       | 9                      | 1150.6 (-1051.0, 3352.1)                   |
| BW            | Growth Defects                      | 11                     | 20695.5 (20695.5, 20695.5)                 |
| CAD           | Cardiovascular Disease              | 13                     | 25800.4 (11533.2, 40067.6)                 |
| CD            | Immune Dysregulation                | 23                     | 30079.3 (7810.1, 52348.4)                  |
| EGFR          | Renal Disorders                     | 14                     | 37595.2 (7356.9, 67833.5)                  |
| EY            | Education and Development Disorders | 31                     | 23597.5 (6249.6, 40945.4)                  |
| HB            | Hematologic Disorders               | 10                     | 36833.0 (-8149.8, 81815.8)                 |
| HDL           | Cardiovascular Disease              | 31                     | 36971.5 (13607.7, 60335.3)                 |
| HGT           | Growth Defects                      | 126                    | 11979.8 (8996.7, 14962.8)                  |
| IBD           | Immune Dysregulation                | 34                     | 20056.1 (6878.5, 33233.6)                  |
| LDL           | Cardiovascular Disease              | 31                     | 22265.1 (8710.4, 35819.8)                  |
| MCH           | Hematologic Disorders               | 15                     | 27415.7 (-7652.6, 62483.9)                 |
| MCV           | Hematologic Disorders               | 20                     | 45984.4 (19152.5, 72816.4)                 |
| MNP           | Female Reproductive Disorders       | 8                      | 12709.2 (763.2, 24655.3)                   |
| MS            | Immune Dysregulation                | 11                     | 508.1 (-73.3, 1089.4)                      |
| PBC           | Immune Dysregulation                | 13                     | 26.3 (-16.9, 69.6)                         |
| PCV           | Disorders of Platelet Function      | 10                     | 18526.7 (-6117.0, 43170.4)                 |
| PLT           | Disorders of Platelet Function      | 12                     | 28178.6 (-10382.2, 66739.4)                |
| RA            | Immune Dysregulation                | 25                     | 5977.6 (-4798.8, 16754.0)                  |
| RBC           | Hematologic Disorders               | 14                     | 18321.6 (-8040.5, 44683.7)                 |
| RHR           | Arrhythmias                         | 17                     | 23161.8 (5088.1, 41235.5)                  |
| SCZ           | Psychiatric Disease                 | 9                      | 35497.2 (15773.4, 55221.0)                 |
| SLE           | Hematologic Disorders               | 10                     | 22618.0 (-2792.1, 48028.1)                 |
| T1D           | Mature-onset Diabetes of the Young  | 11                     | 30051.2 (795.3, 59307.2)                   |
| TC            | Cardiovascular Disease              | 38                     | 15127.2 (4202.1, 26052.2)                  |
| TG            | Cardiovascular Disease              | 25                     | 34214.8 (11785.9, 56643.8)                 |
| UC            | Immune Dysregulation                | 21                     | 30688.6 (7802.3, 53574.8)                  |
| URT           | Bone and Uric Acid Disorders        | 6                      | 156.6 (156.6, 156.6)                       |

**Table S8: Average distance to closest gene, among genes shared by phenotypically-matched complex traits and Mendelian disorders**

For each matched pair of complex trait and Mendelian disorder sharing at least two genes, we computed the average distance to the next closest gene within the chromosome, among all shared genes.

| Trait | Mendelian Gene Set                 | Num. Credible SNPs interacting with Promoters | Number of SNPs in 95% Credible Set | Max Effect Size | Mendelian Disorder Genes                                                                                                                             |
|-------|------------------------------------|-----------------------------------------------|------------------------------------|-----------------|------------------------------------------------------------------------------------------------------------------------------------------------------|
| 2HG   | Mature-onset Diabetes of the Young | 8                                             | 5017                               | 2.00            | <i>ADRB1 PNLIP</i>                                                                                                                                   |
| BFP   | Body Mass Disorders                | 36                                            | 25172                              | 2.94            | <i>CPT1C</i>                                                                                                                                         |
| BMI   | Body Mass Disorders                | 156                                           | 122891                             | 6.08            | <i>CREBBP CYP19A1 GCGR MMACHC NEUROD1 PDX1 PRKACA PTEN</i>                                                                                           |
| BW    | Growth Defects                     | 790                                           | 110715                             | 7.89            | <i>ACADVL BLM C5 COG6 GMNN HSPG2 JAG1 MMAA MPDU1 MUSK PNPO PTH1R SETD2 SLC34A1</i>                                                                   |
| CAD   | Cardiovascular Disease             | 353                                           | 75678                              | 21.05           | <i>ACTA2 BRIP1 CDKN2A CPT2 FLAD1 MAP2K1 NDUFS3 POLG PPM1D PRKAG2 PTPN11 REST</i>                                                                     |
| CBMI  | Body Mass Disorders                | 84                                            | 20137                              | 2.57            | <i>BDNF MTPP NFKB1</i>                                                                                                                               |
| HBA   | Monogenic Diabetes                 | 99                                            | 11348                              | 2.10            | <i>IRS2</i>                                                                                                                                          |
| HDL   | Cardiovascular Disease             | 283                                           | 41573                              | 11.82           | <i>APOA2 COQ2 DCAF8 GNAI2 MPZ MTPP NDUFS2 NDUFS3 NSMCE2 NTRK1 PPARG SMPD1 TIMMDC1 UAP1</i>                                                           |
| LDL   | Cardiovascular Disease             | 234                                           | 40203                              | 12.59           | <i>ADD1 ANGPTL3 BCS1L CASP8 COL4A3 CREB1 GLB1 HESX1 IDUA MRPL44 NDUFAF4 NDUFS1 SMARCAL1 SPEG TNNC1 TSG101 WFS1</i>                                   |
| LEPB  | Body Mass Disorders                | 23                                            | 10038                              | 4.75            | <i>LEP PAX4</i>                                                                                                                                      |
| RHR   | Arrhythmias                        | 400                                           | 145978                             | 13.05           | <i>CACNA1C CALM1 GJA1 PTCH1 TTN</i>                                                                                                                  |
| T2D   | Monogenic Diabetes                 | 51                                            | 15092                              | 4.70            | <i>ADD1 CIDEC LEP OGG1 PAX4 PPARG WFS1</i>                                                                                                           |
| TC    | Cardiovascular Disease             | 229                                           | 31232                              | 20.35           | <i>ANGPTL3 CDKN2A CHKB FAM20A GLB1 NSMCE2 PINK1 ABCA1 ABCG2 CAV1 FKTN FOXC2 GNPTAB IGF1 ISCU MLYCD MYBPC3 MYH11 MYLK2 PNPLA8 PPP1R3A PTGIS RSPO1</i> |
| TG    | Cardiovascular Disease             | 367                                           | 79786                              | 5.75            | <i>SLC2A2 ZMPSTE24</i>                                                                                                                               |
| WHR   | Body Mass Disorders                | 134                                           | 55280                              | 3.89            | <i>CPT1C F5 MC3R POLD1 PPARG RAI1</i>                                                                                                                |

**Table S12: Summary of credible SNPs interacting with promoters of phenotypically-matched Mendelian disorder genes in metabolic traits**  
Fine mapping was performed for each complex trait to produce a 95% credible set of SNPs (see Methods). This table summarizes the number of SNPs from the 95% credible set for each complex trait physically interacting with the promoter of a phenotypically-matched Mendelian disorder gene. For reference, the maximum effect size of these SNPs are listed along with the Mendelian disorder genes (italicized) whose promoters participate in the interaction. Physical interactions were determined by promoter capture HI-C in human primary white adipocytes (see Results and Figures 4c and d).

| SNP       | eQTL Effect Size | FDR P-value |
|-----------|------------------|-------------|
| rs1412445 | 0.323            | 8.49E-09    |
| rs1412444 | 0.323            | 8.49E-09    |
| rs1332329 | 0.311            | 4.42E-08    |
| rs2246941 | 0.311            | 4.42E-08    |
| rs2246833 | 0.308            | 5.89E-08    |
| rs2246828 | 0.293            | 2.21E-06    |
| rs1051338 | 0.28             | 9.89E-06    |
| rs2243547 | 0.283            | 7.97E-06    |
| rs1332328 | 0.311            | 4.42E-08    |

**Table S13: LIPA promoter SNP and others in LD are eQTLs LIPA in METSIM.**

rs1332327 and 8 other SNPs in LD were identified and tested as cis-eQTLs for *LIPA*. This table lists all eQTL effect sizes (betas) and FDR-adjusted p-values from cis-eQTL analyses (see Methods).

## **SUPPLEMENTAL MATERIAL AND METHODS**

### *Identification of cis-eQTL and cis-splice-QTL SNPs from METSIM*

RNA was collected from abdominal subcutaneous adipose needle biopsy from a subset of unrelated participants (n=335, IBD sharing < 0.2) from the Finnish Metabolic Syndrome in Men (METSIM; n = 10,197) cohort, as described in detail previously<sup>1,2</sup>. The METSIM participants are Finnish males who have a median age of 57 years (range: 45–74 years)<sup>1</sup>. As previously described in Pan et al<sup>3</sup>, the genotype data was generated using the Illumina HumanOmniExpress BeadChip and then imputed with IMPUTE2<sup>4</sup> using phase 1 version 3 of the 1000 Genomes Project as the reference panel. The imputed data was filtered using the threshold of info  $\geq 0.8$ , MAF  $\geq 5\%$ , and Hardy–Weinberg equilibrium (HWE)  $p > 0.00001$ . For the RNA-seq data, we performed a 2-pass alignment against the hg19 human reference genome using STAR<sup>5</sup> and used the uniquely mapped reads for gene expression estimation. We inverse normal transformed the FPKMs and regressed out 22 PEER<sup>6</sup> factors to adjust for hidden confounding factors. The cis-eQTL analysis was performed using Matrix-eQTL<sup>7</sup>. To identify the GWAS signals among the cis-eQTLs, the GWAS SNPs were obtained from the NHGRI GWAS Catalog<sup>8</sup>.

## REFERENCES CITED

1. Laakso, M., Kuusisto, J., Stancakova, A., Kuulasmaa, T., Pajukanta, P., Lusi, A.J., Collins, F.S., Mohlke, K.L., and Boehnke, M. (2017). The Metabolic Syndrome in Men study: a resource for studies of metabolic and cardiovascular diseases. *J Lipid Res* 58, 481-493.
2. Stancakova, A., Civelek, M., Saleem, N.K., Soininen, P., Kangas, A.J., Cederberg, H., Paananen, J., Pihlajamaki, J., Bonnycastle, L.L., Morcken, M.A., et al. (2012). Hyperglycemia and a common variant of GCKR are associated with the levels of eight amino acids in 9,369 Finnish men. *Diabetes* 61, 1895-1902.
3. Pan DZ, et al. Integration of human adipocyte chromosomal interactions with local adipose gene expression identifies obesity genes beyond GWAS. *Nature Communications*, .
4. Howie, B.N., Donnelly, P., and Marchini, J. (2009). A flexible and accurate genotype imputation method for the next generation of genome-wide association studies. *PLoS Genet* 5, e1000529.
5. Dobin, A., Davis, C.A., Schlesinger, F., Drenkow, J., Zaleski, C., Jha, S., Batut, P., Chaisson, M., and Gingeras, T.R. (2013). STAR: ultrafast universal RNA-seq aligner. *Bioinformatics* 29, 15-21.
6. Stegle, O., Parts, L., Piipari, M., Winn, J., and Durbin, R. (2012). Using probabilistic estimation of expression residuals (PEER) to obtain increased power and interpretability of gene expression analyses. *Nat Protoc* 7, 500-507.
7. Shabalin, A.A. (2012). Matrix eQTL: ultra fast eQTL analysis via large matrix operations. *Bioinformatics* 28, 1353-1358.
8. Welter, D., MacArthur, J., Morales, J., Burdett, T., Hall, P., Junkins, H., Klemm, A., Flicek, P., Manolio, T., Hindorf, L., et al. (2014). The NHGRI GWAS Catalog, a curated resource of SNP-trait associations. *Nucleic Acids Res* 42, D1001-1006.
